# Supplementary material for: Combining the Anticancer and Immunomodulatory Effects of Astragalus and Shiitake as an Integrated Therapeutic Approach
Source: MDPI journal article supplement (doi:10.3390/nu13082564), 2021-07-27
Supplement: s1 [file s1]

Supplementary Table S1 Anticancer properties of selected plant/mushroom bioactives *in vitro*, in preclinical animal models, and in clinical trials.

| Plant/Component                | Bioactives                              | Doses                  | Cell line/Animal models/Trial details                          | Mechanism                                                                                                                                                                                                                  | Comments                                                                              | Reference |
|--------------------------------|-----------------------------------------|------------------------|----------------------------------------------------------------|----------------------------------------------------------------------------------------------------------------------------------------------------------------------------------------------------------------------------|---------------------------------------------------------------------------------------|-----------|
| <i>In vitro studies</i>        |                                         |                        |                                                                |                                                                                                                                                                                                                            |                                                                                       |           |
| <i>Astragalus membranaceus</i> | APS ( <i>Astragalus</i> Polysaccharide) | 800 ug/mL<br>10 mM     | MCF7, MDA-MB-231                                               | APS inhibits Wnt/ $\beta$ -catenin signalling pathway (Lithium Chloride used to identify Wnt pathway)                                                                                                                      | 0, 25, 50, 100, 200, 400, 800 or 1,600 $\mu$ g/ml APS treated for 24 hours; MTT Assay | [1]       |
| <i>Astragalus membranaceus</i> | APS                                     | 50 ug/mL               | A549 cells co-cultivated with mesenchymal stem cells           | Reduced cell proliferation and improved cell morphology                                                                                                                                                                    | Effects regulated by MAPK-NFkB pathway                                                | [2]       |
| <i>Astragalus membranaceus</i> | Astragaloside- IV                       | (10 – 160) ug/ml       | Hepatocellular carcinoma cell lines – SMMC-7721 and huh - 7    | Decreased expression for long non-coding RNA (Lnc RNA) and inactivated signalling of IL-11/STAT 3                                                                                                                          |                                                                                       | [3]       |
| <i>Astragalus membranaceus</i> | Astragaloside- IV                       | (10 – 40) $\mu$ mol/L  | Human gastric carcinoma BGC-823 cell line                      | Significant increase in microRNA-214 expression and decrease in microRNA-301a expression that led to subsequent decrease in expression of SOX2 and NANOG                                                                   |                                                                                       | [4]       |
| <i>Astragalus membranaceus</i> | Astragaloside- IV                       | 0.1 mM                 | 5-fluorouracil resistant human lung cancer cells (Bel-7402/FU) | Significant decrease in expression of multi-drug resistant gene (MDR1) by downregulating the JNK/c-Jun/AP-1 signalling pathway                                                                                             |                                                                                       | [5]       |
| <i>Astragalus membranaceus</i> | APS extracted at 4 and 90 $^{\circ}$ C  | (25 – 800) ug/ml       | MGC-803, A549 and HepG2 cells                                  | APS4 showed higher content of (1 $\rightarrow$ 2,6)- $\alpha$ -d-Glcp compared to APS4-90 and APS90, which indicated that higher branched degree would be responsible for the stronger in vitro antitumor activity in APS4 |                                                                                       | [6]       |
| <i>Lentinus edodes</i>         | $\beta$ -glucans fractions              | 1, 0.33 and 0.11 mg/mL | A549 (NSCLC), MDA-MB-231 (breast cancer cells)                 | Cell viability assayed – reduced by 20% at 0.11 mg/mL, 95% at 0.33 mg/mL                                                                                                                                                   | 6 fractions from ultrafiltration process                                              | [7]       |

|                                                                   |                                                                                                                                          |                               |                                                     |                                                                                                                                                                        |      |
|-------------------------------------------------------------------|------------------------------------------------------------------------------------------------------------------------------------------|-------------------------------|-----------------------------------------------------|------------------------------------------------------------------------------------------------------------------------------------------------------------------------|------|
|                                                                   |                                                                                                                                          |                               |                                                     | and 100% at 1 mg/mL (breast cancer cells)<br>Induced apoptosis at 1 mg/mL                                                                                              |      |
| <i>Lentinus edodes</i>                                            | Treated (with formic acid, lactic acid and boiled at 100°C) and non-treated water soluble <i>lentinula edodes</i> polysaccharides (LEPs) | (25 – 250) ug/ml              | Human breast cancer cell lines (MCF-7 and T47D)     | Non-treated LEPs showed high anti-proliferative activities in MCF-7 and T47D compared to treated LEPs                                                                  | [8]  |
| <i>Lentinus edodes</i>                                            | LEPs (triple helix structure) and LEPs (single flexible chain)                                                                           | (5 – 500) ug/ml               | Sarcoma-180 tumor cells                             | LEPs with triple helix structure had higher inhibition of tumor growth compared to the single flexible chain LEPs                                                      | [9]  |
| <i>AHCC and Wasbi combination (L edodes and Wasabia japonica)</i> | Glucans and 6-methyl-sulfinyl-hexyl isothiocyanate                                                                                       | (7.5 – 500) ug/ml             | MCF7, Panc02, Adenocarcinoma cell lines             | Significant increase in G(0)/G(1) together with marked percentage of apoptotic cells, BAIC reduced the size and number of mamosphere formation from the stem cells     | [10] |
| <i>Lentinus edodes</i>                                            | Lacriptin – 4 domain                                                                                                                     |                               | HepG2 cells                                         | Inhibit growth of human HepG2 cells                                                                                                                                    | [11] |
| <i>Lentinus edodes</i>                                            | Lacriptin – 11 domain                                                                                                                    | (6.25 – 200) ug/ml            | U937 (lymphoma)                                     | Induce apoptosis                                                                                                                                                       | [12] |
| <i>Lentinus edodes</i>                                            | Lacriptin – 1 domain                                                                                                                     | 0 to 120 ug/mL                | SGC-7901, BGC-823, SKOV-3, HepG-2, MDA-MB-231, MCF7 | IC50 of 31.5 and 40.7 ug/mL for SGC-7901 and BGC-823                                                                                                                   | [13] |
| <i>Lentinus edodes</i>                                            | LSMS-1 & LSMS-2 (polysaccharide from crude extract)                                                                                      | 25, 50, 100, 200, 400 ug/mL   | A549, SGC7901, MCF7, U937, MG63                     | Inhibition was maximum at 400 ug/mL                                                                                                                                    | [14] |
| <i>Lentinus edodes</i>                                            | Water extract CP                                                                                                                         | 0.2, 0.5, 1.0, 2.0, 5.0 mg/mL | Hep-2 cells and MRC-5 (normal cells)                | IC50 = ~1 mg/mL<br>Early apoptosis at 1 mg/mL and late apoptotic event 2 mg/mL                                                                                         | [15] |
| <i>A. bisporus, brown A. bisporus Lentinus edodes</i>             | b-glucan                                                                                                                                 | 0-100 ug/mL                   | PC3                                                 | No significant changes in cell viability observed, dose dependent cell proliferation inhibition obtained. Ethanolic extractions reduced IL-8 production and a trend in | [16] |

|                                                                                                              |                                                                                              |                                                                          |                                                                                                                                                                             |                                                                                                                                                                                                                      |                                                                                           |
|--------------------------------------------------------------------------------------------------------------|----------------------------------------------------------------------------------------------|--------------------------------------------------------------------------|-----------------------------------------------------------------------------------------------------------------------------------------------------------------------------|----------------------------------------------------------------------------------------------------------------------------------------------------------------------------------------------------------------------|-------------------------------------------------------------------------------------------|
|                                                                                                              |                                                                                              |                                                                          |                                                                                                                                                                             | VEGF secretion at higher concentration.                                                                                                                                                                              |                                                                                           |
| <i>Lycium barbarum</i>                                                                                       | Arabinogalactan Purified fractions of <i>L. barabarum</i> crude polysaccharides (LBP-1)      | 50, 100, 200, 400, 800 ug/mL for 24 hours                                | Hepatoma cells (SMMC-7721 and HepG2), cervical cancer cells (HeLa), gastric carcinoma cells (SGC 7901), Human breast cancer cells (MCF7) and normal human liver cells (L02) | Affected cell viability in a tissue specific manner. The inhibition of growth was mediated through cell cycle arrest and apoptosis.                                                                                  | [17]                                                                                      |
| <i>L. edodes</i>                                                                                             | LEP-1 and LEP-2                                                                              | 0.056, 0.112, 0.224, 0.448, 0.896, 1.792 mg/mL for 72 hours              | HCT116<br>HeLa cells                                                                                                                                                        |                                                                                                                                                                                                                      | [18]                                                                                      |
| <i>A. membranaceous</i> in combination with quercetin, dithiodipropionic acid, folic acid and curcumin (Cur) | Quercetin-3'-dithiodipropionic acid- <i>Astragalus</i> polysaccharides-Folic acid (QDAF)@Cur | (0.5 – 20) ug/ml of Cur                                                  | MCF7 (Breast cancer cell line)                                                                                                                                              | Increased intracellular uptake, tumour inhibition and apoptosis in ER- $\alpha$ positive cell lines                                                                                                                  | [19]                                                                                      |
| <i>Astragalus membranaceous</i>                                                                              | Astragaloside IV                                                                             | (100 – 400) uM                                                           | HCC (SK-Hep1 & Hep38 cells)                                                                                                                                                 | Induce extrinsic /intrinsic apoptosis, trigger G (1) arrest                                                                                                                                                          | [20]                                                                                      |
| <i>Astragalus membranaceous</i>                                                                              | APS                                                                                          | 50,100,200, 500, 1000 ug/mL and CM (Conditioned medium from macrophages) | 4T1 cells                                                                                                                                                                   | APS treated macrophages suppressed 4T1 by mitochondrial apoptotic pathway                                                                                                                                            | [21]                                                                                      |
| <i>Astragalus membranaceous</i>                                                                              | APS                                                                                          | 5 mg/mL APS time dependent inhibition (48h)                              | Prostate cancer cells (PC3 and DU145 cells)                                                                                                                                 | miR-138-5p/SIRT1/SREBP1 pathway in PCa                                                                                                                                                                               | <i>In-vitro</i> and <i>In-vivo</i> Inhibited proliferation and invasion of PCa cells [22] |
| <i>Astragalus membranaceous</i>                                                                              | APS                                                                                          | 0.25,0.5,0.75,1 and 2 mg/mL incubated for 24, 48, 72 and 96 hours        | MCF7, MDA-MB-231 cells                                                                                                                                                      | Cell viability, migration and invasion assays demonstrates that APS interferes growth of MCF and MDA-MB-231 cells in a dose dependent manner. Mechanistically APS downregulated the expression of CCNB1 and CDC6 and | [23]                                                                                      |

|                                                                                      |                                                                                                                              |                                                                                                                                                                                                        |                                                                                     |                                                                                                                                                                                                           |                                                                                                                                                                                                                                                                                                                                                                                                                |      |
|--------------------------------------------------------------------------------------|------------------------------------------------------------------------------------------------------------------------------|--------------------------------------------------------------------------------------------------------------------------------------------------------------------------------------------------------|-------------------------------------------------------------------------------------|-----------------------------------------------------------------------------------------------------------------------------------------------------------------------------------------------------------|----------------------------------------------------------------------------------------------------------------------------------------------------------------------------------------------------------------------------------------------------------------------------------------------------------------------------------------------------------------------------------------------------------------|------|
|                                                                                      |                                                                                                                              |                                                                                                                                                                                                        |                                                                                     | upregulate the tumour suppressor gene p53.                                                                                                                                                                |                                                                                                                                                                                                                                                                                                                                                                                                                |      |
| <i>Lentinus edodes</i>                                                               | $\beta$ -glucans fractions                                                                                                   |                                                                                                                                                                                                        | MDA-MB-231                                                                          |                                                                                                                                                                                                           |                                                                                                                                                                                                                                                                                                                                                                                                                | [24] |
| Desert truffles<br><i>Terfezia boudieri</i>                                          | Aqueous/methanolic extract                                                                                                   | 0.78 to 25 mg/mL incubated for 48h                                                                                                                                                                     | T47D, MCF7, MDA-MB-231, HCT116, HeLa, Vero (normal)                                 |                                                                                                                                                                                                           |                                                                                                                                                                                                                                                                                                                                                                                                                | [25] |
| Preclinical animal studies                                                           |                                                                                                                              |                                                                                                                                                                                                        |                                                                                     |                                                                                                                                                                                                           |                                                                                                                                                                                                                                                                                                                                                                                                                |      |
| <i>Astragalus membranaceus</i> in combination with rhubarb and <i>Curcuma longae</i> | Astragalus:rhubarb:rhihoma <i>Curcuma longae</i> (3:1:1) crude decoction in combination with small interfering RNAs (siRNAs) | 6.4g/kg                                                                                                                                                                                                | Female Nude Mouse (xenograft with MCF7)                                             | Increase the expression of Nrf2 and Suppress the expression of PI3K/AKT/mTOR signalling pathway                                                                                                           |                                                                                                                                                                                                                                                                                                                                                                                                                | [26] |
| <i>Astragalus membranaceus</i>                                                       | Astragaloside - IV                                                                                                           | 160 ug/ml<br>80 ug/ml                                                                                                                                                                                  | Female C57BL/6 mice (xenograft with 3LL-luc cells)                                  | Significant increase in expression of cytotoxic T lymphocytes while decreased expression for T regulatory cells                                                                                           |                                                                                                                                                                                                                                                                                                                                                                                                                | [27] |
| <i>Astragalus membranaceus</i>                                                       | <i>Astragalus</i> saponins (AST)                                                                                             | 0.02,0.04, 0.08, 0.16, 0.2 mg/mL (0,12, 24,48,72h)<br><br>2% DSS (n=8, positive control), 0.1 mg/g AST (n=8, negative control) and 0.1 mg/g AST treatment combined with 2% DSS in drinking water (n=8) | Invitro (HT29, SW620) and in-vivo (DSS induced colitis mouse model – c57BL/6J mice) | IC50 for HT-29 and SW620 were 35 and 46 ug/mL<br>AST inhibits cell proliferation in a dose dependent manner and induces apoptosis (decreases Bcl2, PARP and pro-caspase-3 and increases Bax, Bak and Bad) | AST could inhibit growth and glycolysis metabolism in CRC cells <i>in vitro</i> , and attenuate the inflammatory response and tumor-like aerobic glycolysis in the DSS-induced mouse model. The findings indicated that AST may have the capacity to resist tumor-associated inflammation and maintain normal glucose homeostasis, suggesting that AST could be a novel therapeutic strategy in CRC treatment. | [28] |

|                                                                                                                                                                                                |                                                                |                                                                                                                                   |                                                                              |                                                                                                             |                                                       |      |
|------------------------------------------------------------------------------------------------------------------------------------------------------------------------------------------------|----------------------------------------------------------------|-----------------------------------------------------------------------------------------------------------------------------------|------------------------------------------------------------------------------|-------------------------------------------------------------------------------------------------------------|-------------------------------------------------------|------|
| Mushroom mix<br><i>Agaricus blazei</i> ,<br><i>Ophiocordyceps</i><br><i>sinensis</i> , <i>Ganoderma</i><br><i>lucidum</i> , <i>Grifola</i><br><i>frondosa</i> , and<br><i>Lentinula edodes</i> | Micotherapy U-care                                             | The blend contains 20% each of the 5 mushrooms. 16 mice received 4 mg of supplement per day – 4 healthy controls and 14 untreated | 8 wk old BALB/c Syngene mice (4T1 triple negative mouse breast cancer model) | Reduced pulmonary metastasis density, decreased fibrotic response and reduced IL-6, NOS and COX2 expression |                                                       | [29] |
| <i>Astragalus membranaceus</i>                                                                                                                                                                 | APS<br>5FU<br>APS+5FU                                          | Blank, negative (0.9% NS), APS (100 & 200 ug/Kg), 5FU (20 mg/Kg), Combined (200 mg/Kg APS + 20 mg/Kg 5FU)                         | Female BALB/c mice                                                           | Anticancer activity by restoring immune organs, increased cytokine release, induced phagocytosis            | Along with 5FU - Immune adjuvant for chemotherapy     | [21] |
| <i>Astragalus membranaceus</i>                                                                                                                                                                 | APS                                                            | NC, LD-APS (50 mg/Kg), HD-APS (100 mg/Kg) OD – PO for 14 days                                                                     | Nude mouse                                                                   | Reduced tumour size and fatty acid                                                                          |                                                       | [22] |
| water extract of ginseng and <i>Astragalus</i> (WEGA)                                                                                                                                          | WEGA                                                           | 0,5,10,20 mg/mL – cell culture and 0, 30, 60 and 120 mg/Kg bwt for animal experimentation                                         | A549 cells and Tumour Associated macrophages                                 |                                                                                                             |                                                       | [30] |
| <b>Clinical trials</b>                                                                                                                                                                         |                                                                |                                                                                                                                   |                                                                              |                                                                                                             |                                                       |      |
| <i>Astragalus mongholicus</i> and <i>Semen Cuscutae</i> or placebo                                                                                                                             |                                                                |                                                                                                                                   | N – of – 1 with gastric cancer                                               | Randomized double blind and controlled treatment                                                            | Symptoms improved in two patients                     | [31] |
| <i>Antrodia cinnamomea</i>                                                                                                                                                                     | 2.1g PS, 172 mg triterpenoids and 2.6875 g g-aminobutyric acid | 2.1g PS, 172 mg triterpenoids and 2.6875 g g-aminobutyric acid                                                                    | 37 patients with gastric, liver, breast and crc                              | Double blind randomized clinical trial – 30-ay trial                                                        | No significant improvement in the combination therapy | [32] |

|                                                        |                                      |                                  |                                        |      |
|--------------------------------------------------------|--------------------------------------|----------------------------------|----------------------------------------|------|
| SD rat<br>(toxicity)                                   |                                      |                                  |                                        |      |
| <i>Ganoderma lucidum</i>                               |                                      |                                  | Cochrane database<br>– systemic review | [33] |
| <i>Agaricus bisporus</i><br>(white button<br>mushroom) | 6 doses from 4g/day until<br>14g/day | 36 patients – prostate<br>cancer | Phase-I study                          | [34] |

Supplementary Table S2 Anticancer properties of plant and mushroom based bioactives in combination with standard chemotherapeutic agents in *in-vitro* studies, animal models, and clinical trials.

| Plant/Component                            | Bioactive            | Dose                                                                                                                | Cell line/Animal models/Trial details                               | Mechanism                                                                                                                                           | Comments                                                        | Reference |
|--------------------------------------------|----------------------|---------------------------------------------------------------------------------------------------------------------|---------------------------------------------------------------------|-----------------------------------------------------------------------------------------------------------------------------------------------------|-----------------------------------------------------------------|-----------|
| <b><i>In vitro</i> studies</b>             |                      |                                                                                                                     |                                                                     |                                                                                                                                                     |                                                                 |           |
| <i>Astragalus membranaceus</i> + Cisplatin | Astragaloside- IV    | (10 – 40) ng/ml                                                                                                     | Human non-small cell lung cancer cells (A549, NCI-H1299 and HCC827) | Significant increase in chemo sensitivity of cisplatin to lung cancer cells by inhibiting mRNA and B7-H3 proteins                                   |                                                                 | [35]      |
| <i>Astragalus membranaceus</i> Adriamycin  | APS                  | APS (50-200 ug/mL) Adriamycin (0.1 ug/ml)                                                                           | SGC-7901, SGC-7901/ADR, GES-1                                       | APS inhibit gastric carcinoma by signalling AMPK pathway                                                                                            | APS 50 to 200 ug/mL plus or minus Adriamycin (0.1ug/mL)         | [36]      |
| <i>Lentinula edodes</i> Oxaliplatin        | Lentinan Oxaliplatin | 20 uM (Oxaliplatin) 800ug/ml (lentinan)                                                                             | Hepatocellular carcinoma (HepG2) cells                              | Enhanced caspase-3 activation and reduced the expression for NF-κB and survivin                                                                     |                                                                 | [37]      |
| <i>Astragalus membranaceus</i> Taxol       | AS-IV                | 10 – 90 uM (AS-IV) + 1-70 uM (Taxol)                                                                                | MCF7, MDA-MB-231                                                    | Enhance chemosensitivity of Taxol by reversing caveolin-1 expression induced by taxol.                                                              | MTT/CFU assays                                                  | [38]      |
| <i>Astragalus</i> Apatinib                 | APS                  | Apatinib 40 uM + 50, 100, 200 and 400 APS                                                                           | Pancreatic cell lines, ASPC-1 and PANC-1                            | Inhibited cell proliferation in a dose dependent manner, increased apoptotic percentage, significantly enhanced downregulation of AKT, ERK and MMP9 |                                                                 | [39]      |
| <b>Preclinical animal studies</b>          |                      |                                                                                                                     |                                                                     |                                                                                                                                                     |                                                                 |           |
| <i>Astragalus membranaceus</i>             | Astragaloside IV     | NS (control), Cis (3mg/Kg every 2 days PO for 14 days) or Cis+AS IV (3mg/Kg Cis + 50 mg/mL) or AS IV (50 mg/Kg IV). | BALB/c mice                                                         | Downregulated MRP2 expression in tumour cells, but not in HepG2 cells                                                                               | AS IV co-administration increased chemosensitivity of Cisplatin | [40]      |

|                                       |                                       |                                                                                        |                                            |                                                                                |      |
|---------------------------------------|---------------------------------------|----------------------------------------------------------------------------------------|--------------------------------------------|--------------------------------------------------------------------------------|------|
| <i>Lentinus edodes</i><br>Oxaliplatin | Lentinan<br>Oxaliplatin               | Lentinan (25<br>mg/kg, i.p<br>injection)<br>Oxaliplatin<br>(10mg/kg, i.p<br>injection) | Hepatocellular carcinoma<br>(H22) cells    | Downregulated the<br>expression of survivin, Stat3,<br>p-Stat3 and NF-Kb (p65) | [37] |
| Clinical trials                       |                                       |                                                                                        |                                            |                                                                                |      |
| <i>Lentinus edodes</i>                | S-1 based<br>chemotherapy<br>Lentinan | 2 mg/Kg bwt                                                                            | Chemotherapy (n=37)<br>Chemo+Immuno (n=31) |                                                                                | [41] |



Supplementary Table S3 Immunomodulating functions of plant and mushroom based bioactives in *in-vitro* studies, animal models, and clinical trials.

| Plant/Component                | Bioactive                         | Dose                                            | Cell line/Animal models/Trial details                                               | Mechanism                                                                                                                                                                                          | Comments                                                                         | Reference |
|--------------------------------|-----------------------------------|-------------------------------------------------|-------------------------------------------------------------------------------------|----------------------------------------------------------------------------------------------------------------------------------------------------------------------------------------------------|----------------------------------------------------------------------------------|-----------|
| <i>In vitro</i> studies        |                                   |                                                 |                                                                                     |                                                                                                                                                                                                    |                                                                                  |           |
| <i>Astragalus membranaceus</i> | RAP                               | 30, 100, 300 ug/mL<br>RAP or 1ug/mL<br>LPS      | RAW264.7 and 4T1<br>BMDMs (with IL-4 or<br>LPS)<br>BALB/c                           | RAP induce M1 (produced high iNOS, IL-6, TNF-a and CXL10) and skewed M2 to M1 phenotype (downregulated CD206 and upregulated CD86). Activates Notch signalling.                                    | Reduced tumour size in mice received 4T1 grafts and Macrophages treated with RAP | [42]      |
| Shiitake                       | b-glucan                          | 100 ug/mL                                       | PMA differentiated THP-1                                                            | Immunomodulation observed – expression of inflammation-related genes – IL-10 was highest expressed after 24 h of b-glucan.                                                                         | No effect in phagocytosis index noticed except for pure Lentinan.                | [43]      |
| <i>Astragalus membranaceus</i> | APS in combination with cisplatin | APS- 8 and 16 mg/ml                             | H441, H1299, H1437 (human lung cancer cell) and LLC1 (Lewis lung cancer cell)       | PBMCs from lung cancer patients (n=17)                                                                                                                                                             |                                                                                  | [44]      |
| <i>Astragalus membranaceus</i> | PG2 (APS)                         | 10 ug/mL                                        | Breast - 4T1 & colorectal - CT26. Murine WEHI-3 leukemia or murine EL4 lymphoblasts | PG2 reduced PD-L1 production which was associated with downregulation of AKT/mTOR/p70S6K pathway. AKT/mTOR signal increased in murine lymphocytes when co-cultivated with PG2 treated 4T1 or CT26. |                                                                                  | [45]      |
| <i>Astragalus membranaceus</i> | APS                               | 200 to 1000 ug/mL                               | RAW264.7<br>MCF7                                                                    | Increased NO and TNF-a from macrophages and inhibited proliferation, G1 phase arrest and regulated apoptotic genes (13 fold increase in Bax/Bcl-2)                                                 | Increased NO and TNF-a expression directly blocked MCF7 cells                    | [6]       |
| Preclinical animal studies     |                                   |                                                 |                                                                                     |                                                                                                                                                                                                    |                                                                                  |           |
| <i>Astragalus membranaceus</i> | APS                               | 50,100,200, 500, 1000 ug/mL and CM (Conditioned | 4T1 cells                                                                           | APS treated macrophages suppressed 4T1 by                                                                                                                                                          |                                                                                  | [21]      |

|                                                              |                                                                                                                                                    |                                                                                                                               |                                                                                       |                                                                                                                                                                                            |                                                                                   |
|--------------------------------------------------------------|----------------------------------------------------------------------------------------------------------------------------------------------------|-------------------------------------------------------------------------------------------------------------------------------|---------------------------------------------------------------------------------------|--------------------------------------------------------------------------------------------------------------------------------------------------------------------------------------------|-----------------------------------------------------------------------------------|
|                                                              |                                                                                                                                                    | medium from macrophages)                                                                                                      |                                                                                       | mitochondrial apoptotic pathway                                                                                                                                                            |                                                                                   |
| Desert truffles<br><i>Terfezia boudieri</i>                  | Aqueous/methanolic extract                                                                                                                         | 0.78 to 25 mg/mL incubated for 48h                                                                                            |                                                                                       |                                                                                                                                                                                            |                                                                                   |
| <i>Grifola frondosa</i> and <i>Lentinula edodes</i>          | MTG404, Shiitake extract or AHCC                                                                                                                   | 61.5 ug/day MaitakeGold 404, 820 ug/mL Shiitake, 820 ug Shiitake and 61.5 ug Maitake Gold 404 or 100 ug AHCC, PBS for 14 days | Female 8 wk old BALB/c mice                                                           | Phagocytic activity of peritoneal monocytes and neutrophils increased for combination, Maitake, Shiitake and AHCC in that order. Maitake and Shiitake or Maitake alone activated NK cells. | [46]                                                                              |
| <i>Astraalus membranaceous</i>                               | Polysaccharide powder                                                                                                                              |                                                                                                                               | 6-8 wk old C57BL/6 mice (n=15)                                                        | PBMCs from lung cancer patients (n=17)                                                                                                                                                     | [44]                                                                              |
| Clinical trials                                              |                                                                                                                                                    |                                                                                                                               |                                                                                       |                                                                                                                                                                                            |                                                                                   |
| <i>Lentinula edodes</i>                                      | Mycelia extract (LEM) – hot water extract                                                                                                          | 1.8 g/day for 4 weeks                                                                                                         | Cancer patients                                                                       | Improved quality of life, NK cell activity and immunosuppressive additive protein levels                                                                                                   | [47]                                                                              |
| Whole mushroom                                               |                                                                                                                                                    | 5g (n=26) and 10 g (n=25) ODI for 4 weeks                                                                                     | Healthy volunteers (66 males – 21-41 years of age)<br>Randomized parallel group study | The expression of CD69 on $\gamma\delta$ -T cells increased in post treated cells than baseline cells when stimulated with a mitogen for 24 hrs.                                           | Blood drawn before (baseline) and after 4wks of consumption – PBMC and Serum [48] |
| <i>Lentinula edodes</i>                                      | Lentinan b-1,3; 1.6-glucan Lentinex                                                                                                                | 2.5 mg/day                                                                                                                    | Healthy elderly individuals (42)<br>Double blind cross over placebo controlled study  | Increased circulatory B cells but no change in Ig                                                                                                                                          | No change in immunoglobulins, complement proteins or cytokines [49]               |
| <i>Lentinula edodes</i> and Anthracycline based chemotherapy | <i>Lentinula edodes</i> mycelial crude extract (LEM) in combination with chemo drugs (5-FU/ cyclophosphamide/ doxorubicin/pirarubicin/ epirubicin) | LEM - 1800 mg/day for 3 wks for a total of 6 wks                                                                              | Randomized double blind study (47 breast cancer patient)                              | QOL better for LEM group than placebo group<br>Treg reduced for LEM group and increased for placebo group                                                                                  | [50]                                                                              |
| <i>Astraalus membranaceous</i>                               | Polysaccharide powder                                                                                                                              |                                                                                                                               |                                                                                       | PBMCs from lung cancer patients (n=17)                                                                                                                                                     | [44]                                                                              |
| <i>Lentinula edodes</i>                                      | Mycelial extract (LEM)                                                                                                                             | 1800 mg/day for 4 wks                                                                                                         | 10 patients who received DC vaccine therapy or CAT therapy                            | Improved QoL and increased IFN-g secretion from PBMCs (Increased FOX3P/CD4+                                                                                                                | [51]                                                                              |

|                             |
|-----------------------------|
| expression and TGF- $\beta$ |
| excretion) (n=10)           |

## References

1. Yang, S.; Sun, S.; Xu, W.; Yu, B.; Wang, G.; Wang, H. *Astragalus* polysaccharide inhibits breast cancer cell migration and invasion by regulating epithelial-mesenchymal transition via the Wnt/ $\beta$ -catenin signaling pathway. *Mol Med Rep* **2020**, *21*, 1819-1832, doi:10.3892/mmr.2020.10983.
2. Zhang, Y.M.; Liu, Y.Q.; Liu, D.; Zhang, L.; Qin, J.; Zhang, Z.; Su, Y.; Yan, C.; Luo, Y.L.; Li, J.; et al. The Effects of *Astragalus* Polysaccharide on Bone Marrow-Derived Mesenchymal Stem Cell Proliferation and Morphology Induced by A549 Lung Cancer Cells. *Med Sci Monit* **2019**, *25*, 4110-4121, doi:10.12659/msm.914219.
3. Li, Y.; Ye, Y.; Chen, H. Astragaloside IV inhibits cell migration and viability of hepatocellular carcinoma cells via suppressing long noncoding RNA ATB. *Biomed Pharmacother* **2018**, *99*, 134-141, doi:10.1016/j.biopha.2017.12.108.
4. Wang, Z.F.; Ma, D.G.; Zhu, Z.; Mu, Y.P.; Yang, Y.Y.; Feng, L.; Yang, H.; Liang, J.Q.; Liu, Y.Y.; Liu, L.; et al. Astragaloside IV inhibits pathological functions of gastric cancer-associated fibroblasts. *World J Gastroenterol* **2017**, *23*, 8512-8525, doi:10.3748/wjg.v23.i48.8512.
5. Wang, P.P.; Luan, J.J.; Xu, W.K.; Wang, L.; Xu, D.J.; Yang, C.Y.; Zhu, Y.H.; Wang, Y.Q. Astragaloside IV downregulates the expression of MDR1 in Bel7402/FU human hepatic cancer cells by inhibiting the JNK/cJun/AP1 signaling pathway. *Mol Med Rep* **2017**, *16*, 2761-2766, doi:10.3892/mmr.2017.6924.
6. Yu, J.; Ji, H.; Yang, Z.; Liu, A. Relationship between structural properties and antitumor activity of *Astragalus* polysaccharides extracted with different temperatures. *Int J Biol Macromol* **2019**, *124*, 469-477, doi:10.1016/j.ijbiomac.2018.11.156.
7. Sari, M.; Toepler, K.; Nickisch-Hartfiel, A.; Teusch, N.; Hambitzer, R. Cross-Flow Ultrafiltration Fractions of a Cold Aqueous Extract of the Shiitake Culinary-Medicinal Mushroom, *Lentinus edodes* (Agaricomycetes), Exhibit Apoptosis in Tumor Cells. *Int J Med Mushrooms* **2018**, *20*, 1107-11119, doi:10.1615/IntJMedMushrooms.2018028980.
8. Ziaja-Sołtys, M.; Radzki, W.; Nowak, J.; Topolska, J.; Jabłońska-Ryś, E.; Sławińska, A.; Skrzypczak, K.; Kuczumow, A.; Bogucka-Kocka, A. Processed Fruiting Bodies of *Lentinus edodes* as a Source of Biologically Active Polysaccharides. *Applied Sciences* **2020**, *10*, 470. doi:10.3390/app10020470
9. Zhang, L.; Li, X.; Xu, X.; Zeng, F. Correlation between antitumor activity, molecular weight, and conformation of lentinan. *Carbohydr. Res.* **2005**, *340*, 1515-1521, doi:https://doi.org/10.1016/j.carres.2005.02.032.
10. Corradetti, B.; Vaiasicca, S.; Mantovani, M.; Virgili, E.; Bonucci, M.; Hammarberg Ferri, I. Bioactive Immunomodulatory Compounds: A Novel Combinatorial Strategy for Integrated Medicine in Oncology? BAIC Exposure in Cancer Cells. *Integr Cancer Ther* **2019**, *18*, 1534735419866908, doi:10.1177/1534735419866908.
11. Guo, X.; Wang, X.; Liu, M.; Chen, L.; Chanda, W.; Pahiar, A.A.; Li, X.; Zhang, W.; Ning, A.; Huang, M.; et al. Expression and Antitumor Function of Latcripin-4 RCC1 and ANK Domain Protein on HepG2 from the Shiitake Medicinal Mushroom, *Lentinus edodes* C91-3 (Agaricomycetes), Transcriptome. *Int J Med Mushrooms* **2018**, *20*, 1163-1172, doi:10.1615/IntJMedMushrooms.2018028430.
12. Gao, Y.; Padhiar, A.A.; Wang, J.; Zhang, W.; Zhong, M.; Liu, B.; Kang, Z.; Wang, X.; Li, X.; Huang, M. Recombinant latcripin 11 of *Lentinula edodes* C91-3 suppresses the proliferation of various cancer cells. *Gene* **2018**, *642*, 212-219, doi:10.1016/j.gene.2017.10.080.

13. Batool, S.; Joseph, T.P.; Hussain, M.; Vuai, M.S.; Khinsar, K.H.; Din, S.R.U.; Padhiar, A.A.; Zhong, M.; Ning, A.; Zhang, W.; et al. LP1 from *Lentinula edodes* C(91-3) Induces Autophagy, Apoptosis and Reduces Metastasis in Human Gastric Cancer Cell Line SGC-7901. *Int J Mol Sci* **2018**, *19*, doi:10.3390/ijms19102986.
14. Zhang, Y.; Liu, W.; Xu, C.; Huang, W.; He, P. Characterization and Antiproliferative Effect of Novel Acid Polysaccharides from the Spent Substrate of Shiitake Culinary-Medicinal Mushroom *Lentinus edodes* (Agaricomycetes) Cultivation. *Int J Med Mushrooms* **2017**, *19*, 395-403, doi:10.1615/IntJMedMushrooms.v19.i5.20.
15. Finimundy, T.C.; Scola, G.; Scariot, F.J.; Dillon, A.J.P.; Moura, S.; Echeverrigaray, S.; Henriques, J.P.; Roesch-Ely, M. Extrinsic and Intrinsic Apoptotic Responses Induced by Shiitake Culinary-Medicinal Mushroom *Lentinus edodes* (Agaricomycetes) Aqueous Extract against a Larynx Carcinoma Cell Line. *Int J Med Mushrooms* **2018**, *20*, 31-46, doi:10.1615/IntJMedMushrooms.2018025400.
16. French, C.; Lc, C.; Clarke, S.L.; Lucas, E.A.; Smith, B.J.; Lightfoot, S.; Kuvibidila, S.R. The Inhibitory Properties of Ethanol Extracts of Some Culinary-Medicinal Mushrooms on the Secretion of Interleukin-8 and Vascular Endothelial Growth Factor by PC3 Cancer Cells. *Int J Med Mushrooms* **2019**, *21*, 645-656, doi:10.1615/IntJMedMushrooms.2019031168.
17. Gong, G.; Liu, Q.; Deng, Y.; Dang, T.; Dai, W.; Liu, T.; Liu, Y.; Sun, J.; Wang, L.; Liu, Y.; et al. Arabinogalactan derived from *Lycium barbarum* fruit inhibits cancer cell growth via cell cycle arrest and apoptosis. *Int J Biol Macromol* **2020**, *149*, 639-650, doi:10.1016/j.ijbiomac.2020.01.251.
18. Zhao, Y.M.; Wang, J.; Wu, Z.G.; Yang, J.M.; Li, W.; Shen, L.X. Extraction, purification and anti-proliferative activities of polysaccharides from *Lentinus edodes*. *Int J Biol Macromol* **2016**, *93*, 136-144, doi:10.1016/j.ijbiomac.2016.05.100.
19. Wang, B.; Guo, C.; Liu, Y.; Han, G.; Li, Y.; Zhang, Y.; Xu, H.; Chen, D. Novel nano-pomegranates based on *Astragalus* polysaccharides for targeting ER $\alpha$ -positive breast cancer and multidrug resistance. *Drug Deliv* **2020**, *27*, 607-621, doi:10.1080/10717544.2020.1754529.
20. Su, C.M.; Wang, H.C.; Hsu, F.T.; Lu, C.H.; Lai, C.K.; Chung, J.G.; Kuo, Y.C. Astragaloside IV Induces Apoptosis, G(1)-Phase Arrest and Inhibits Anti-apoptotic Signaling in Hepatocellular Carcinoma. *In Vivo* **2020**, *34*, 631-638, doi:10.21873/in vivo.11817.
21. Li, W.; Hu, X.; Wang, S.; Jiao, Z.; Sun, T.; Liu, T.; Song, K. Characterization and anti-tumor bioactivity of *Astragalus* polysaccharides by immunomodulation. *Int J Biol Macromol* **2020**, *145*, 985-997, doi:10.1016/j.ijbiomac.2019.09.189.
22. Guo, S.; Ma, B.; Jiang, X.; Li, X.; Jia, Y. *Astragalus* Polysaccharides Inhibits Tumorigenesis and Lipid Metabolism Through miR-138-5p/SIRT1/SREBP1 Pathway in Prostate Cancer. *Front Pharmacol* **2020**, *11*, 598, doi:10.3389/fphar.2020.00598.
23. Liu, C.; Li, H.; Wang, K.; Zhuang, J.; Chu, F.; Gao, C.; Liu, L.; Feng, F.; Zhou, C.; Zhang, W.; et al. Identifying the Antiproliferative Effect of *Astragalus* Polysaccharides on Breast Cancer: Coupling Network Pharmacology With Targetable Screening From the Cancer Genome Atlas. *Front Oncol* **2019**, *9*, 368, doi:10.3389/fonc.2019.00368.
24. Morales, D.; Rutkevicki, R.; Villalva, M.; Abreu, H.; Soler-Rivas, C.; Santoyo, S.; Iacomini, M.; Smiderle, F.R. Isolation and comparison of  $\alpha$ - and  $\beta$ -D-glucans from shiitake mushrooms (*Lentinula edodes*) with different biological activities. *Carbohydr Polym* **2020**, *229*, 115521, doi:10.1016/j.carbpol.2019.115521.

25. Al Obaydi, M.F.; Hamed, W.M.; Al Kury, L.T.; Talib, W.H. Terfezia boudieri: A Desert Truffle With Anticancer and Immunomodulatory Activities. *Front Nutr* **2020**, *7*, 38, doi:10.3389/fnut.2020.00038.
26. Zhang, X.Q.; Yao, C.; Bian, W.H.; Chen, X.; Xue, J.X.; Zhu, Z.Y.; Ying, Y.; Xu, Y.L.; Wang, C. Effects of Astragaloside IV on treatment of breast cancer cells execute possibly through regulation of Nrf2 via PI3K/AKT/mTOR signaling pathway. *Food Sci Nutr* **2019**, *7*, 3403-3413, doi:10.1002/fsn3.1154.
27. Zhang, A.; Zheng, Y.; Que, Z.; Zhang, L.; Lin, S.; Le, V.; Liu, J.; Tian, J. Astragaloside IV inhibits progression of lung cancer by mediating immune function of Tregs and CTLs by interfering with IDO. *J Cancer Res Clin Oncol* **2014**, *140*, 1883-1890, doi:10.1007/s00432-014-1744-x.
28. Guo, H.; Wan, B.; Wang, J.; Zhang, J.; Yao, W.; Shen, Z. Astragalus saponins inhibit cell growth, aerobic glycolysis and attenuate the inflammatory response in a DSS-induced colitis model. *Int J Mol Med* **2019**, *43*, 1041-1048, doi:10.3892/ijmm.2018.4036.
29. Roda, E.; Luca, F.; Iorio, C.D.; Ratto, D.; Siciliani, S.; Ferrari, B.; Cobelli, F.; Borsci, G.; Priori, E.C.; Chinosi, S.; et al. Novel Medicinal Mushroom Blend as a Promising Supplement in Integrative Oncology: A Multi-Tiered Study using 4T1 Triple-Negative Mouse Breast Cancer Model. *Int J Mol Sci* **2020**, *21*, doi:10.3390/ijms21103479.
30. Chen, Y.; Bi, L.; Luo, H.; Jiang, Y.; Chen, F.; Wang, Y.; Wei, G.; Chen, W. Water extract of ginseng and Astragalus regulates macrophage polarization and synergistically enhances DDP's anticancer effect. *J Ethnopharmacol* **2019**, *232*, 11-20, doi:10.1016/j.jep.2018.12.003.
31. Global Burden of Disease Cancer, C.; Fitzmaurice, C.; Abate, D.; Abbasi, N.; Abbastabar, H.; Abd-Allah, F.; Abdel-Rahman, O.; Abdelalim, A.; Abdoli, A.; Abdollahpour, I.; et al. Global, Regional, and National Cancer Incidence, Mortality, Years of Life Lost, Years Lived With Disability, and Disability-Adjusted Life-Years for 29 Cancer Groups, 1990 to 2017: A Systematic Analysis for the Global Burden of Disease Study. *JAMA Oncol* **2019**, doi:10.1001/jamaoncol.2019.2996.
32. Tsai, M.Y.; Hung, Y.C.; Chen, Y.H.; Chen, Y.H.; Huang, Y.C.; Kao, C.W.; Su, Y.L.; Chiu, H.H.; Rau, K.M. A preliminary randomised controlled study of short-term Antrodia cinnamomea treatment combined with chemotherapy for patients with advanced cancer. *BMC Complement Altern Med* **2016**, *16*, 322, doi:10.1186/s12906-016-1312-9.
33. Jin, X.; Ruiz Beguerie, J.; Sze, D.M.; Chan, G.C. Ganoderma lucidum (Reishi mushroom) for cancer treatment. *Cochrane Database Syst Rev* **2016**, *4*, Cd007731, doi:10.1002/14651858.CD007731.pub3.
34. Twardowski, P.; Kanaya, N.; Frankel, P.; Synold, T.; Ruel, C.; Pal, S.K.; Junqueira, M.; Prajapati, M.; Moore, T.; Tryon, P.; et al. A phase I trial of mushroom powder in patients with biochemically recurrent prostate cancer: Roles of cytokines and myeloid-derived suppressor cells for Agaricus bisporus-induced prostate-specific antigen responses. *Cancer* **2015**, *121*, 2942-2950, doi:10.1002/cncr.29421.
35. He, C.S.; Liu, Y.C.; Xu, Z.P.; Dai, P.C.; Chen, X.W.; Jin, D.H. Astragaloside IV Enhances Cisplatin Chemosensitivity in Non-Small Cell Lung Cancer Cells Through Inhibition of B7-H3. *Cell Physiol Biochem* **2016**, *40*, 1221-1229, doi:10.1159/000453175.
36. Song, J.; Chen, Y.; He, D.; Tan, W.; Lv, F.; Liang, B.; Xia, T.; Li, J. Astragalus Polysaccharide Promotes Adriamycin-Induced Apoptosis in Gastric Cancer Cells. *Cancer Manag Res* **2020**, *12*, 2405-2414, doi:10.2147/cmar.S237146.

37. Zhang, Y.; Li, Q.; Wang, J.; Cheng, F.; Huang, X.; Cheng, Y.; Wang, K. Polysaccharide from *Lentinus edodes* combined with oxaliplatin possesses the synergy and attenuation effect in hepatocellular carcinoma. *Cancer Letters* **2016**, *377*, 117-125, doi:https://doi.org/10.1016/j.canlet.2016.04.037.
38. Zheng, Y.; Dai, Y.; Liu, W.; Wang, N.; Cai, Y.; Wang, S.; Zhang, F.; Liu, P.; Chen, Q.; Wang, Z. Astragaloside IV enhances taxol chemosensitivity of breast cancer via caveolin-1-targeting oxidant damage. *J Cell Physiol* **2019**, *234*, 4277-4290, doi:10.1002/jcp.27196.
39. Wu, J.; Wang, J.; Su, Q.; Ding, W.; Li, T.; Yu, J.; Cao, B. Traditional Chinese medicine *Astragalus* polysaccharide enhanced antitumor effects of the angiogenesis inhibitor apatinib in pancreatic cancer cells on proliferation, invasiveness, and apoptosis. *Onco Targets Ther* **2018**, *11*, 2685-2698, doi:10.2147/OTT.S157129.
40. Qu, X.; Gao, H.; Zhai, J.; Sun, J.; Tao, L.; Zhang, Y.; Song, Y.; Hu, T. Astragaloside IV enhances cisplatin chemosensitivity in hepatocellular carcinoma by suppressing MRP2. *Eur J Pharm Sci* **2020**, *148*, 105325, doi:10.1016/j.ejps.2020.105325.
41. Ina, K.; Furuta, R.; Kataoka, T.; Kayukawa, S.; Yoshida, T.; Miwa, T.; Yamamura, Y.; Takeuchi, Y. Lentinan prolonged survival in patients with gastric cancer receiving S-1-based chemotherapy. *World J Clin Oncol* **2011**, *2*, 339-343, doi:10.5306/wjco.v2.i10.339.
42. Wei, W.; Li, Z.P.; Bian, Z.X.; Han, Q.B. *Astragalus* Polysaccharide RAP Induces Macrophage Phenotype Polarization to M1 via the Notch Signaling Pathway. *Molecules* **2019**, *24*, doi:10.3390/molecules24102016.
43. Chanput, W.; Reitsma, M.; Kleinjans, L.; Mes, J.J.; Savelkoul, H.F.; Wichers, H.J.  $\beta$ -Glucans are involved in immune-modulation of THP-1 macrophages. *Mol Nutr Food Res* **2012**, *56*, 822-833, doi:10.1002/mnfr.201100715.
44. Bamodu, O.A.; Kuo, K.T.; Wang, C.H.; Huang, W.C.; Wu, A.T.H.; Tsai, J.T.; Lee, K.Y.; Yeh, C.T.; Wang, L.S. *Astragalus* polysaccharides (PG2) Enhances the M1 Polarization of Macrophages, Functional Maturation of Dendritic Cells, and T Cell-Mediated Anticancer Immune Responses in Patients with Lung Cancer. *Nutrients* **2019**, *11*, doi:10.3390/nu11102264.
45. Chang, H.L.; Kuo, Y.H.; Wu, L.H.; Chang, C.M.; Cheng, K.J.; Tyan, Y.C.; Lee, C.H. The extracts of *Astragalus membranaceus* overcome tumor immune tolerance by inhibition of tumor programmed cell death protein ligand-1 expression. *Int J Med Sci* **2020**, *17*, 939-945, doi:10.7150/ijms.42978.
46. Vetvicka, V.; Vetvickova, J. Immune-enhancing effects of Maitake (*Grifola frondosa*) and Shiitake (*Lentinula edodes*) extracts. *Ann Transl Med* **2014**, *2*, 14, doi:10.3978/j.issn.2305-5839.2014.01.05.
47. Yamaguchi, Y.; Miyahara, E.; Hihara, J. Efficacy and safety of orally administered *Lentinula edodes* mycelia extract for patients undergoing cancer chemotherapy: a pilot study. *Am J Chin Med* **2011**, *39*, 451-459, doi:10.1142/S0192415X11008956.
48. Dai, X.; Stanilka, J.M.; Rowe, C.A.; Esteves, E.A.; Nieves, C., Jr.; Spaiser, S.J.; Christman, M.C.; Langkamp-Henken, B.; Percival, S.S. Consuming *Lentinula edodes* (Shiitake) Mushrooms Daily Improves Human Immunity: A Randomized Dietary Intervention in Healthy Young Adults. *J Am Coll Nutr* **2015**, *34*, 478-487, doi:10.1080/07315724.2014.950391.

49. Gaullier, J.M.; Sleboda, J.; Øfjord, E.S.; Ulvestad, E.; Nurminiemi, M.; Moe, C.; Tor, A.; Gudmundsen, O. Supplementation with a soluble  $\beta$ -glucan exported from Shiitake medicinal mushroom, *Lentinus edodes* (Berk.) singer mycelium: a crossover, placebo-controlled study in healthy elderly. *Int J Med Mushrooms* **2011**, *13*, 319-326, doi:10.1615/intjmedmushr.v13.i4.10.
50. Nagashima, Y.; Yoshino, S.; Yamamoto, S.; Maeda, N.; Azumi, T.; Komoike, Y.; Okuno, K.; Iwasa, T.; Tsurutani, J.; Nakagawa, K.; et al. *Lentinula edodes* mycelia extract plus adjuvant chemotherapy for breast cancer patients: Results of a randomized study on host quality of life and immune function improvement. *Mol Clin Oncol* **2017**, *7*, 359-366, doi:10.3892/mco.2017.1346.
51. Tanigawa, K.; Itoh, Y.; Kobayashi, Y. Improvement of QOL and Immunological Function With *Lentinula Edodes* Mycelia in Patients Undergoing Cancer Immunotherapy: An Open Pilot Study. *Altern Ther Health Med* **2016**, *22*, 36-42.
